# Supplementary material for: Structures of in vitro assembly products of poxvirus scaffolding protein reveal transition from pre-assembly state to fully assembled scaffold
Source: Research Square preprint supplement (doi:10.21203/rs.3.rs-6671899/v1), 2025-06-03
Supplement: Supplementary file 1 [file 49143eeeb697d3232a85f293.docx]

**SUPPLEMENTARY INFORMATION**

**Structures of *in vitro* assembly products of poxvirus scaffolding protein reveal transition from pre-assembly state to fully assembled scaffold**

Yeontae Jang1,†, Seungmi Kim1,†, Seu-Na Lee2, Bumhan Ryu3, Hyeongseop Jeong4, Eun Sung Kang5,6, Jae Hoon Sul1,7, Yong Ho Kim5,6,8, Dong-Gyu Jo1,9,10,11, and Jaekyung Hyun1,11,*

1School of Pharmacy, Sungkyunkwan University, Suwon 16419, Republic of Korea

2Biomolecular Sociology Group, Institute for Basic Science, Daejeon 34126, Republic of Korea

3Research Solution Center, Institute for Basic Science, Daejeon 34126, Republic of Korea

4Center for Bio-Imaging and Translational Research, Korea Basic Science Institute, Cheongju 28119, Republic of Korea

5SKKU Advanced Institute of Nanotechnology (SAINT), Sungkyunkwan University, Suwon 16419, Republic of Korea

6Department of Nano Science and Technology, Sungkyunkwan University, Suwon 16419, Republic of Korea

7Helen and Robert Appel Alzheimer's Disease Research Institute, Brain and Mind Research Institute, Weill Cornell Medicine, New York, NY 10021, USA.

8Department of Nano Engineering, Sungkyunkwan University, Suwon 16419, Republic of Korea

9Biomedical Institute for Convergence, Sungkyunkwan University, Suwon 16419, Republic of Korea

10Institute of Quantum Biophysics, Sungkyunkwan University, Suwon, Republic of Korea

11Department of MetaBioHealth, Sungkyunkwan University, Suwon 16419, Republic of Korea

†: These authors contributed equally to this work

*Correspondence: [jhyu002@skku.edu](mailto:jhyu002@skku.edu)


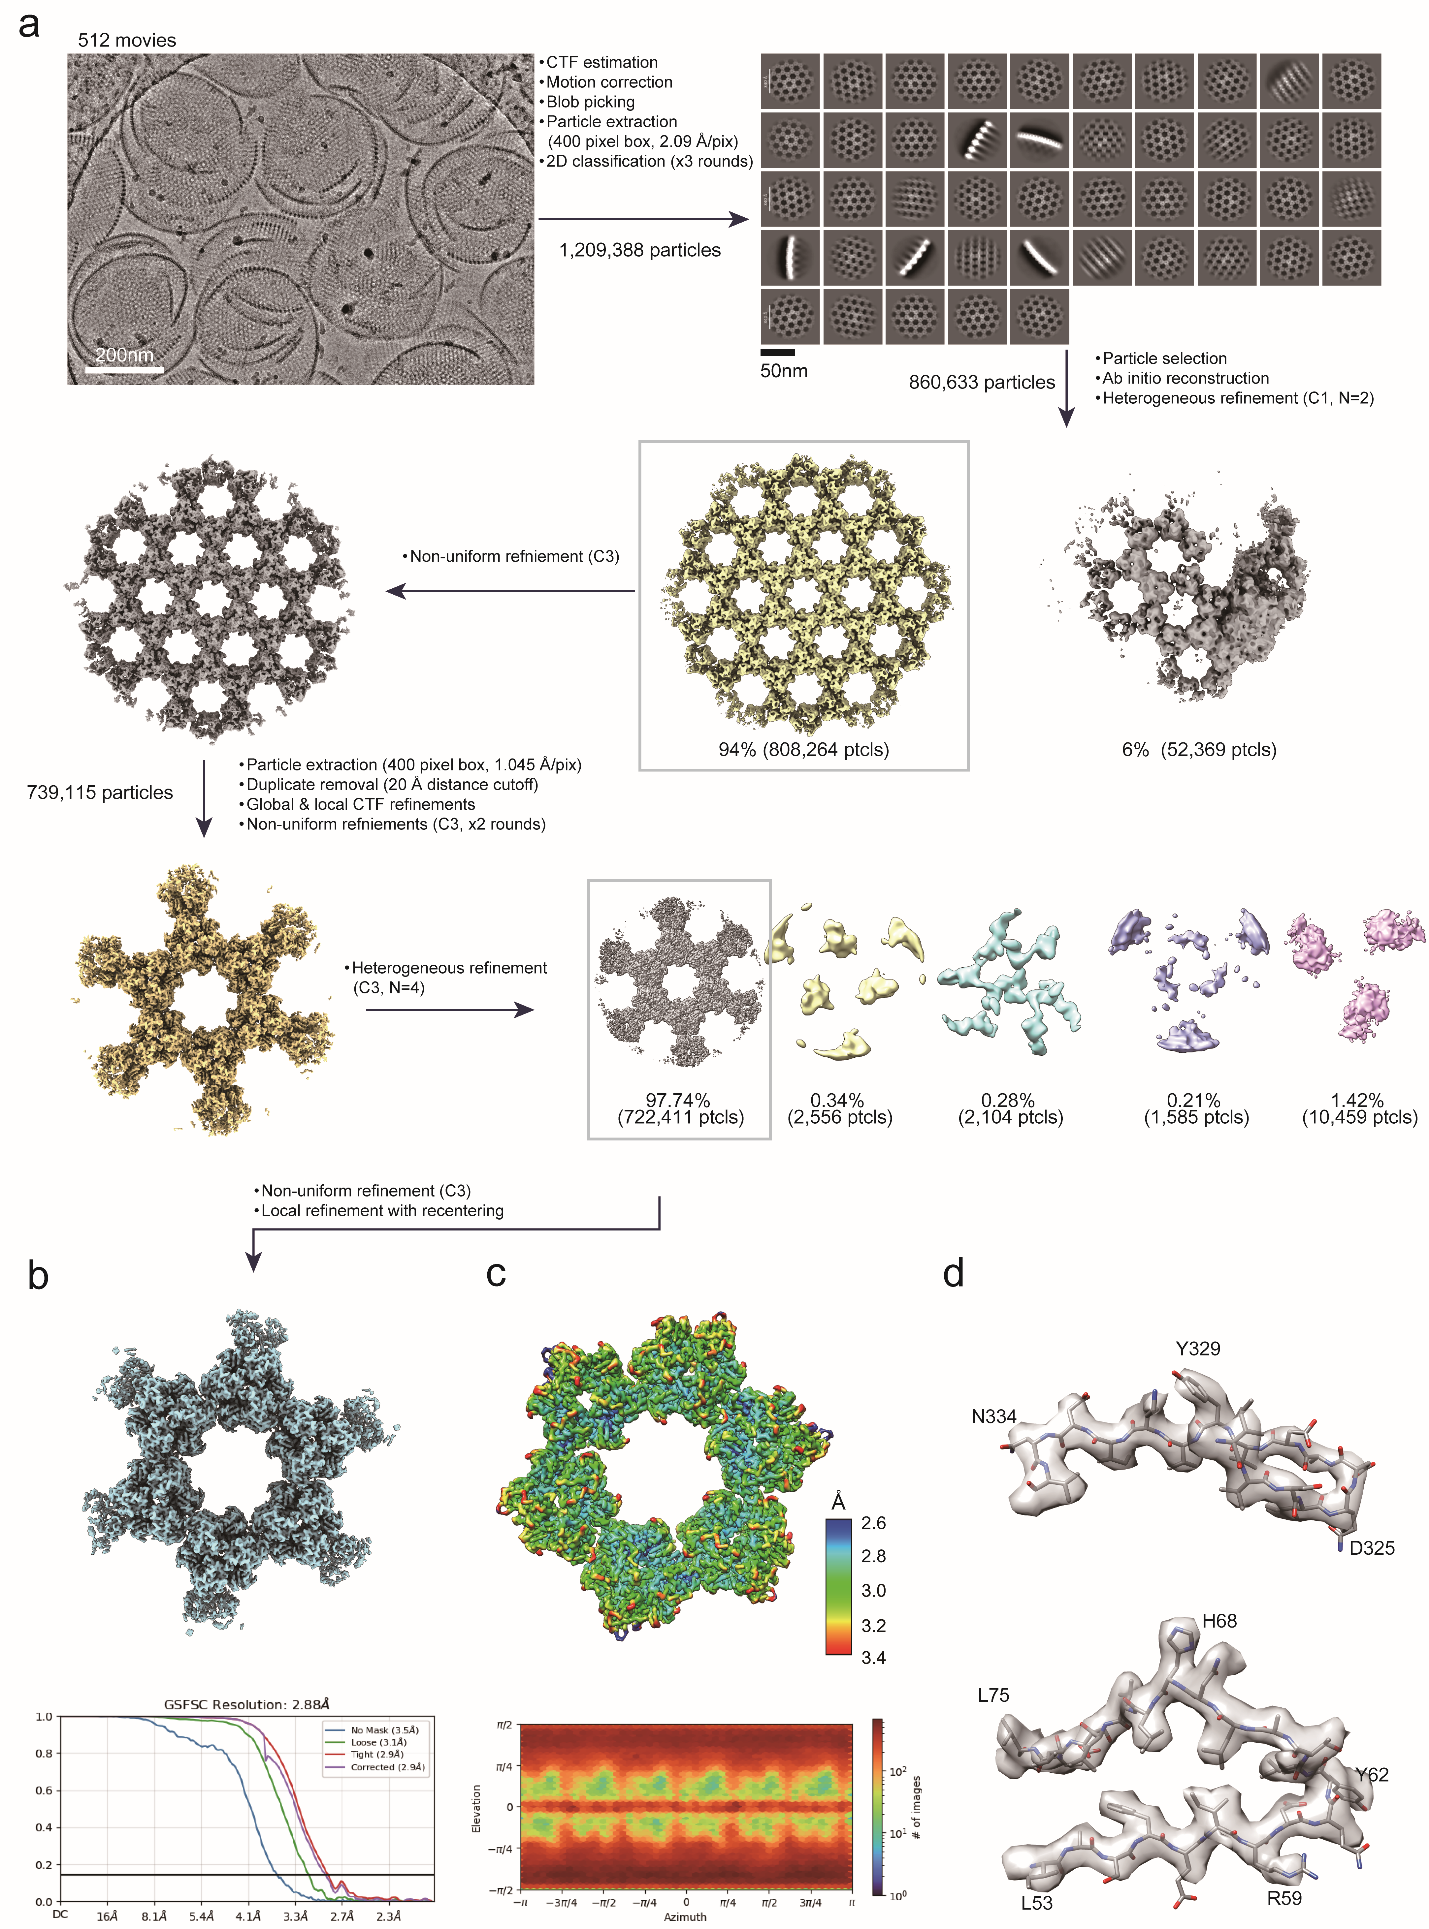


**Supplementary Fig. 1 | Single particle analysis of the His6-tagged D13 SLP. a**, Image processing workflow of the His₆-tagged D13 SLP. **b**, Final 3D reconstruction and FSC plot that indicates 2.88Å resolution (FSC=0.143). **c**, Local resolution estimation (top panel) and angular particle orientation plot (bottom panel). **d**, Example of fitted atomic model into the cryo-EM map.


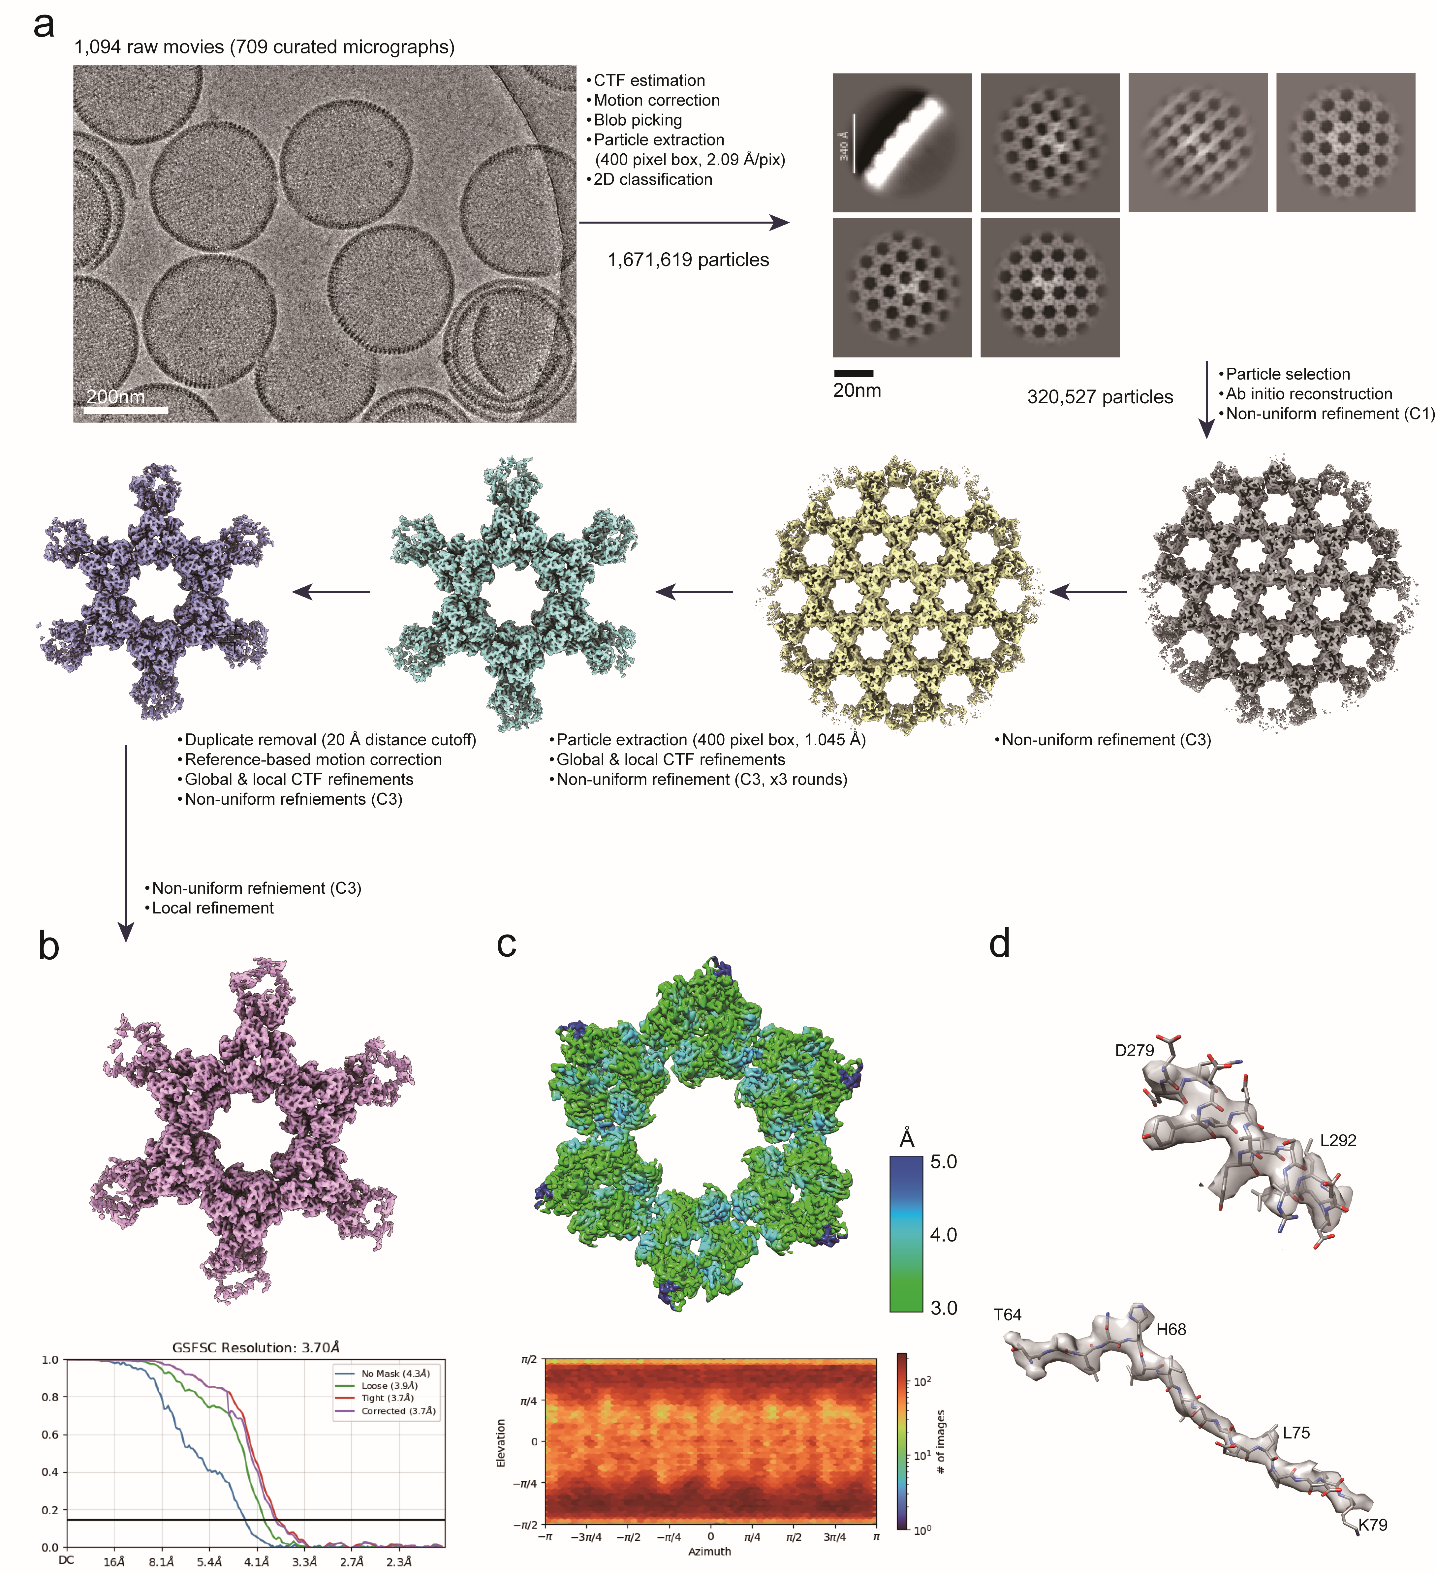


**Supplementary Fig. 2 | Single particle analysis of the eGFP-D13 SLP. a**, Image processing workflow of the eGFP-D13 SLP. **b**, Final 3D reconstruction and FSC plot that indicates 3.7Å resolution (FSC=0.143). **c**, Local resolution estimation (top panel) and angular particle orientation plot (bottom panel). **d**, Example of fitted atomic model into the cryo-EM map.

**
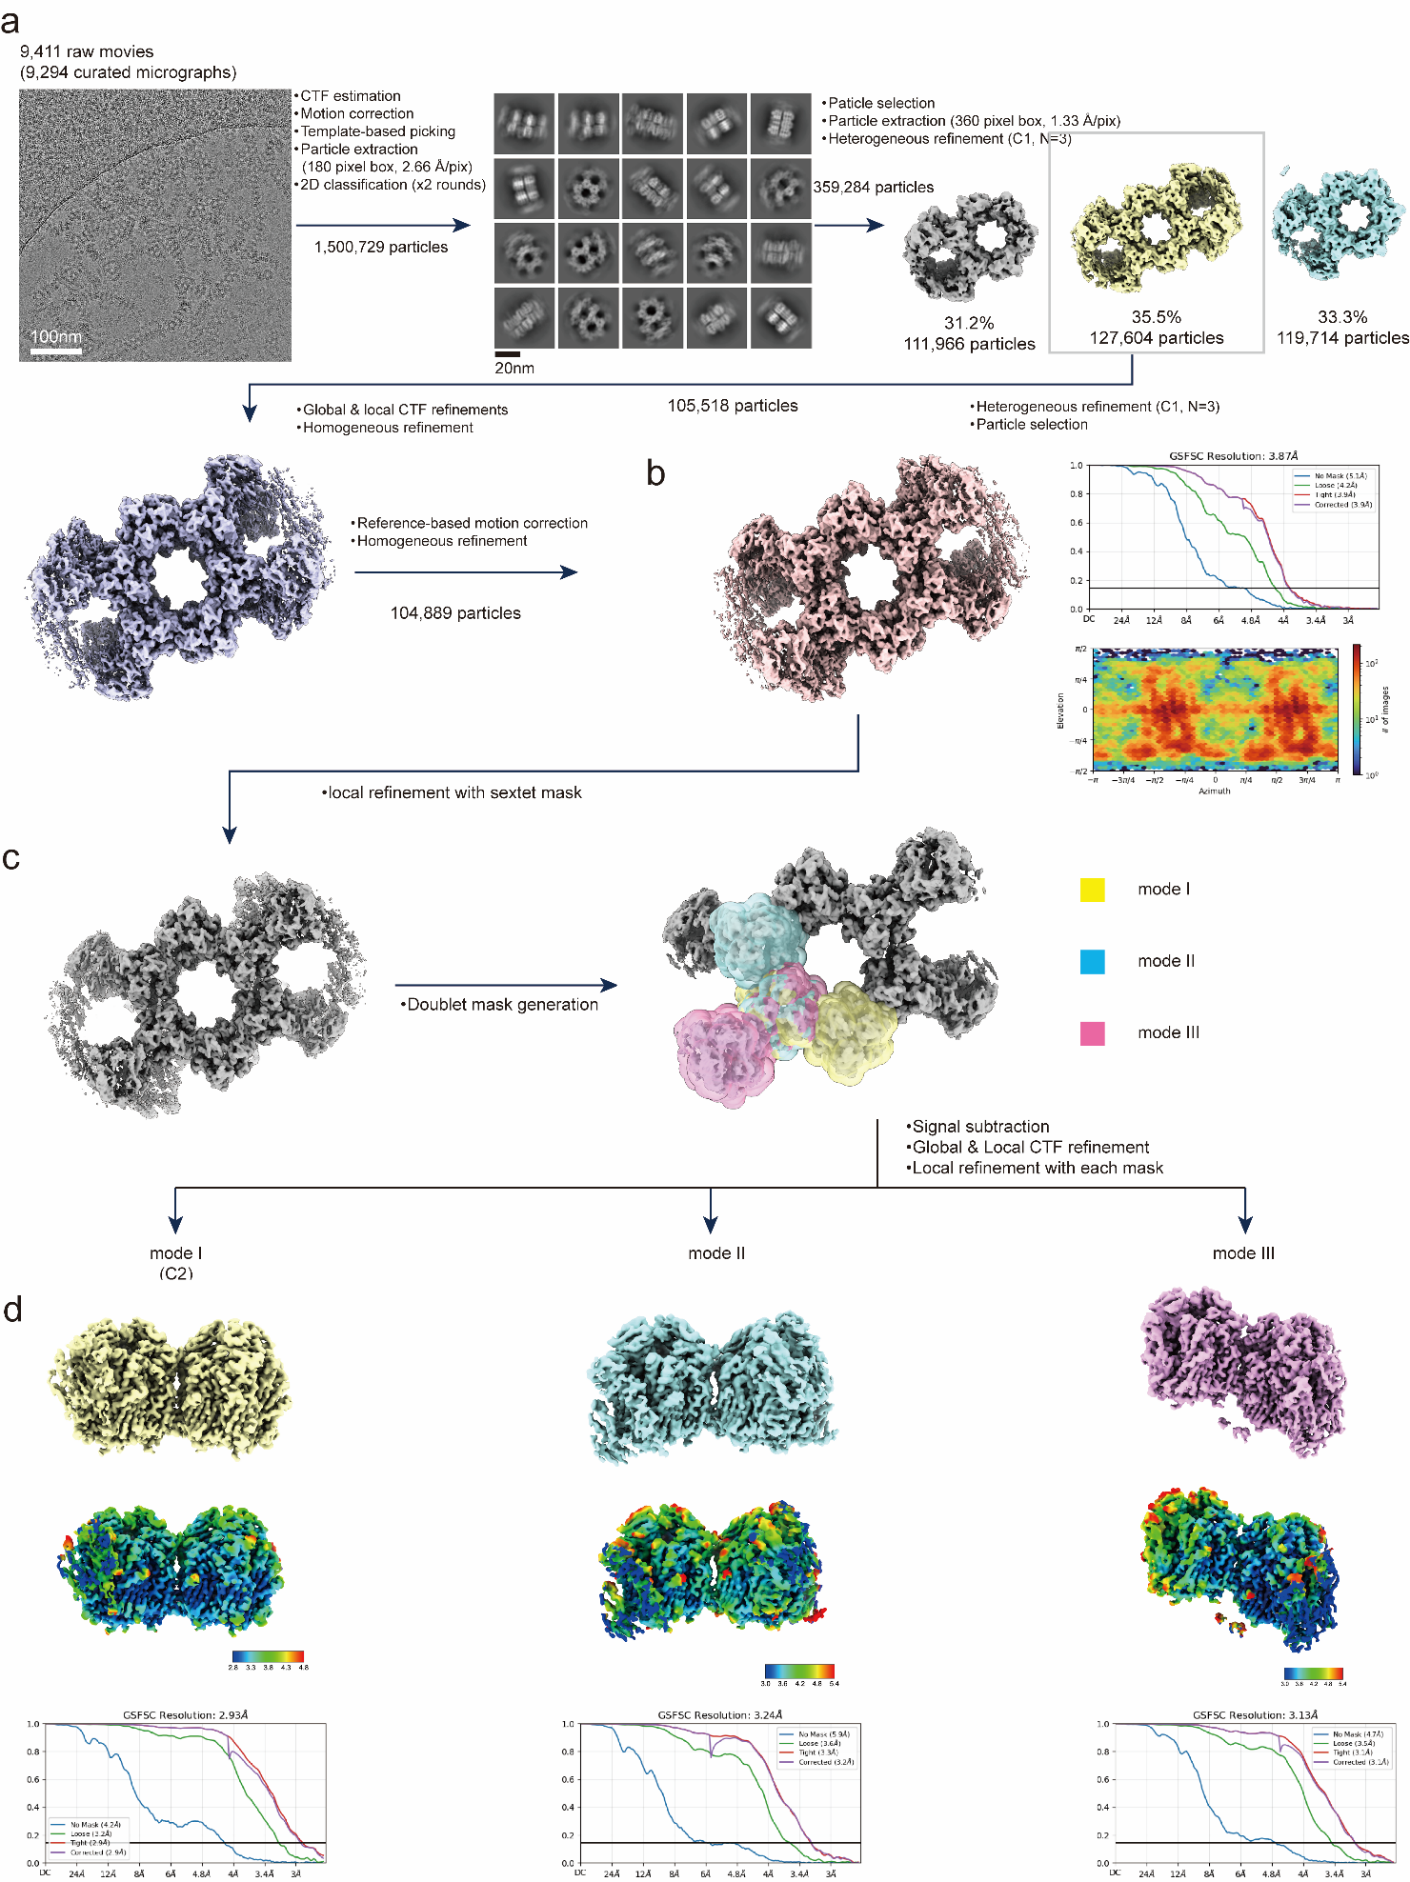
**

**Supplementary Fig. 3 | Single particle analysis of the twister assembly. a**, Image processing workflow of the twister. **b**, Consensus 3D reconstruction and FSC plot that indicates 3.87Å resolution (FSC=0.143). **c**, Image processing scheme of focused refinements on interacting trimer doublets. **d**, Final 3D maps, local resolution plots and FSC plots for trimer pairs that are engaged in the mode I, II and III interfaces.


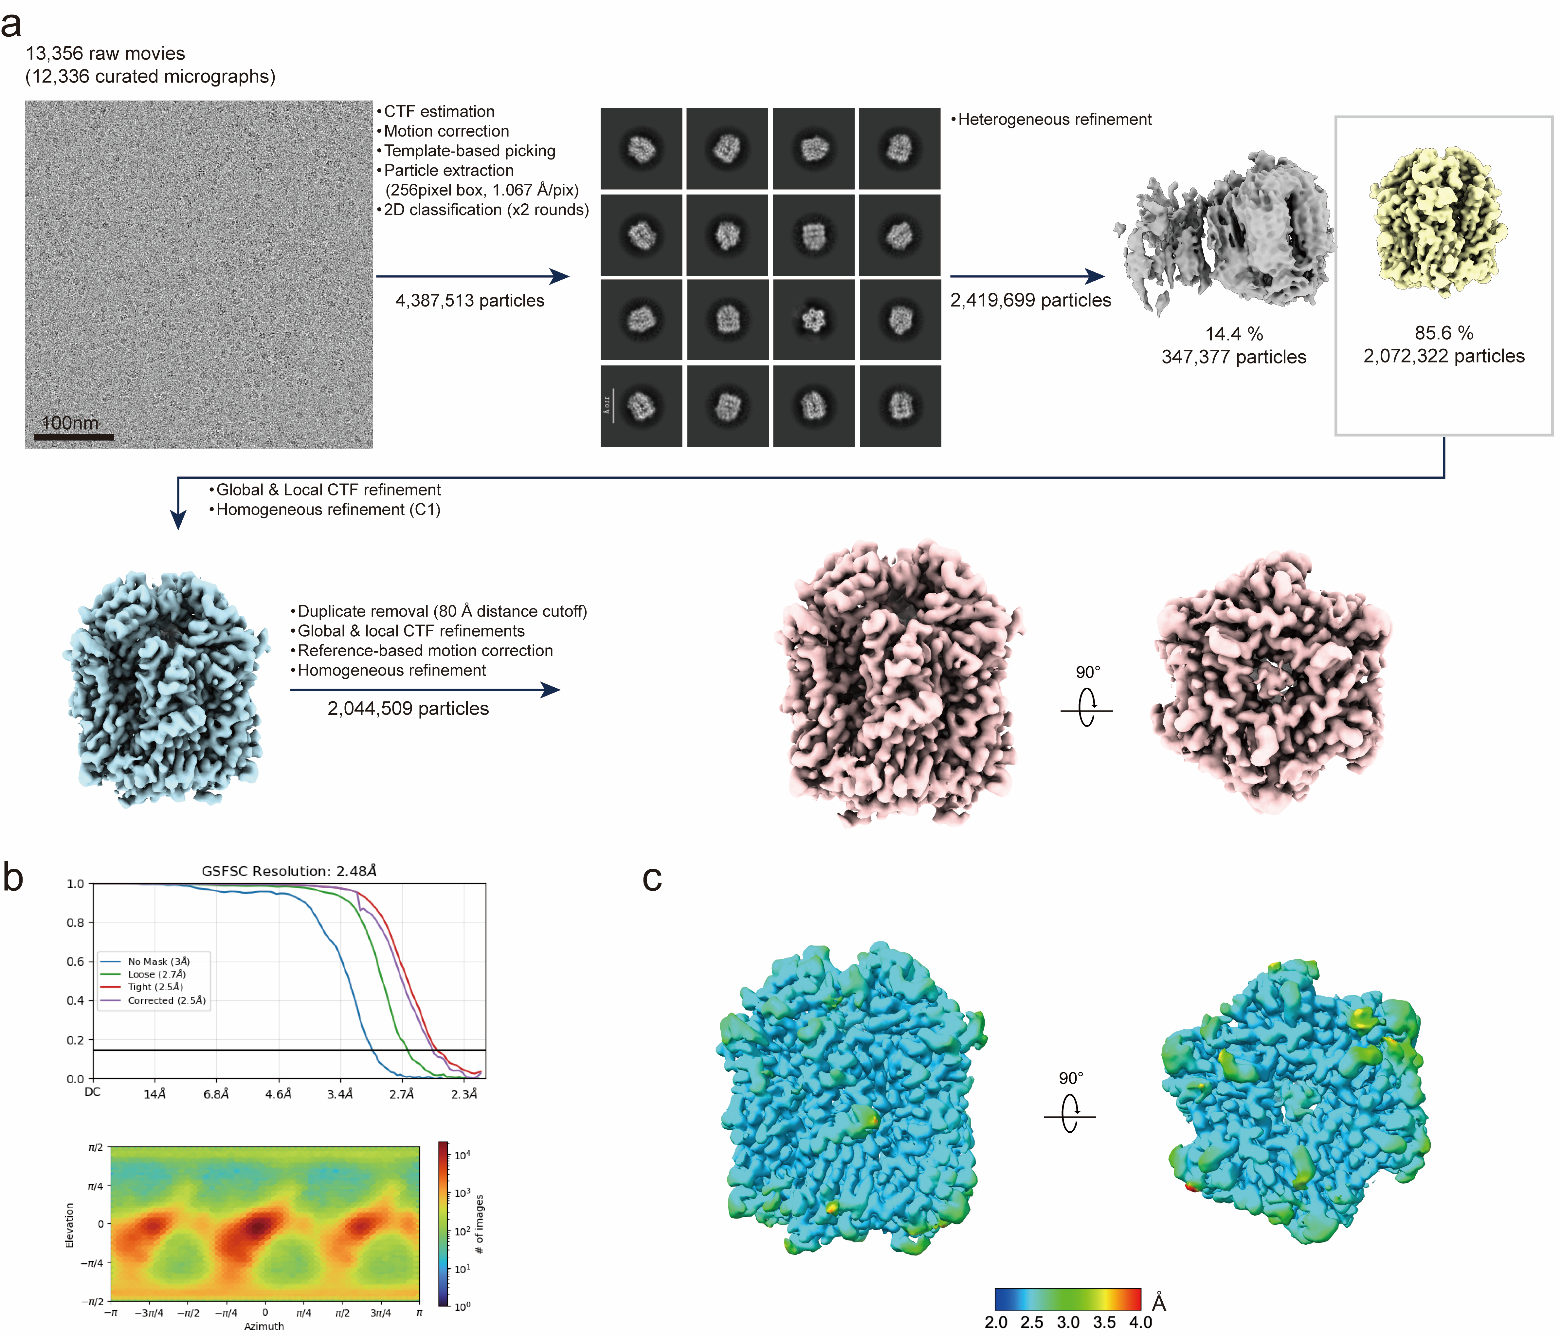


**Supplementary Fig. 4 | Single particle analysis of the A171-8-bound D13 trimer. a**, Image processing workflow of the A171-8 peptide-bound D13 trimer. **b**, Final 3D reconstruction and FSC plot that indicates 2.48Å resolution (FSC=0.143). **(c)** Local resolution estimation.


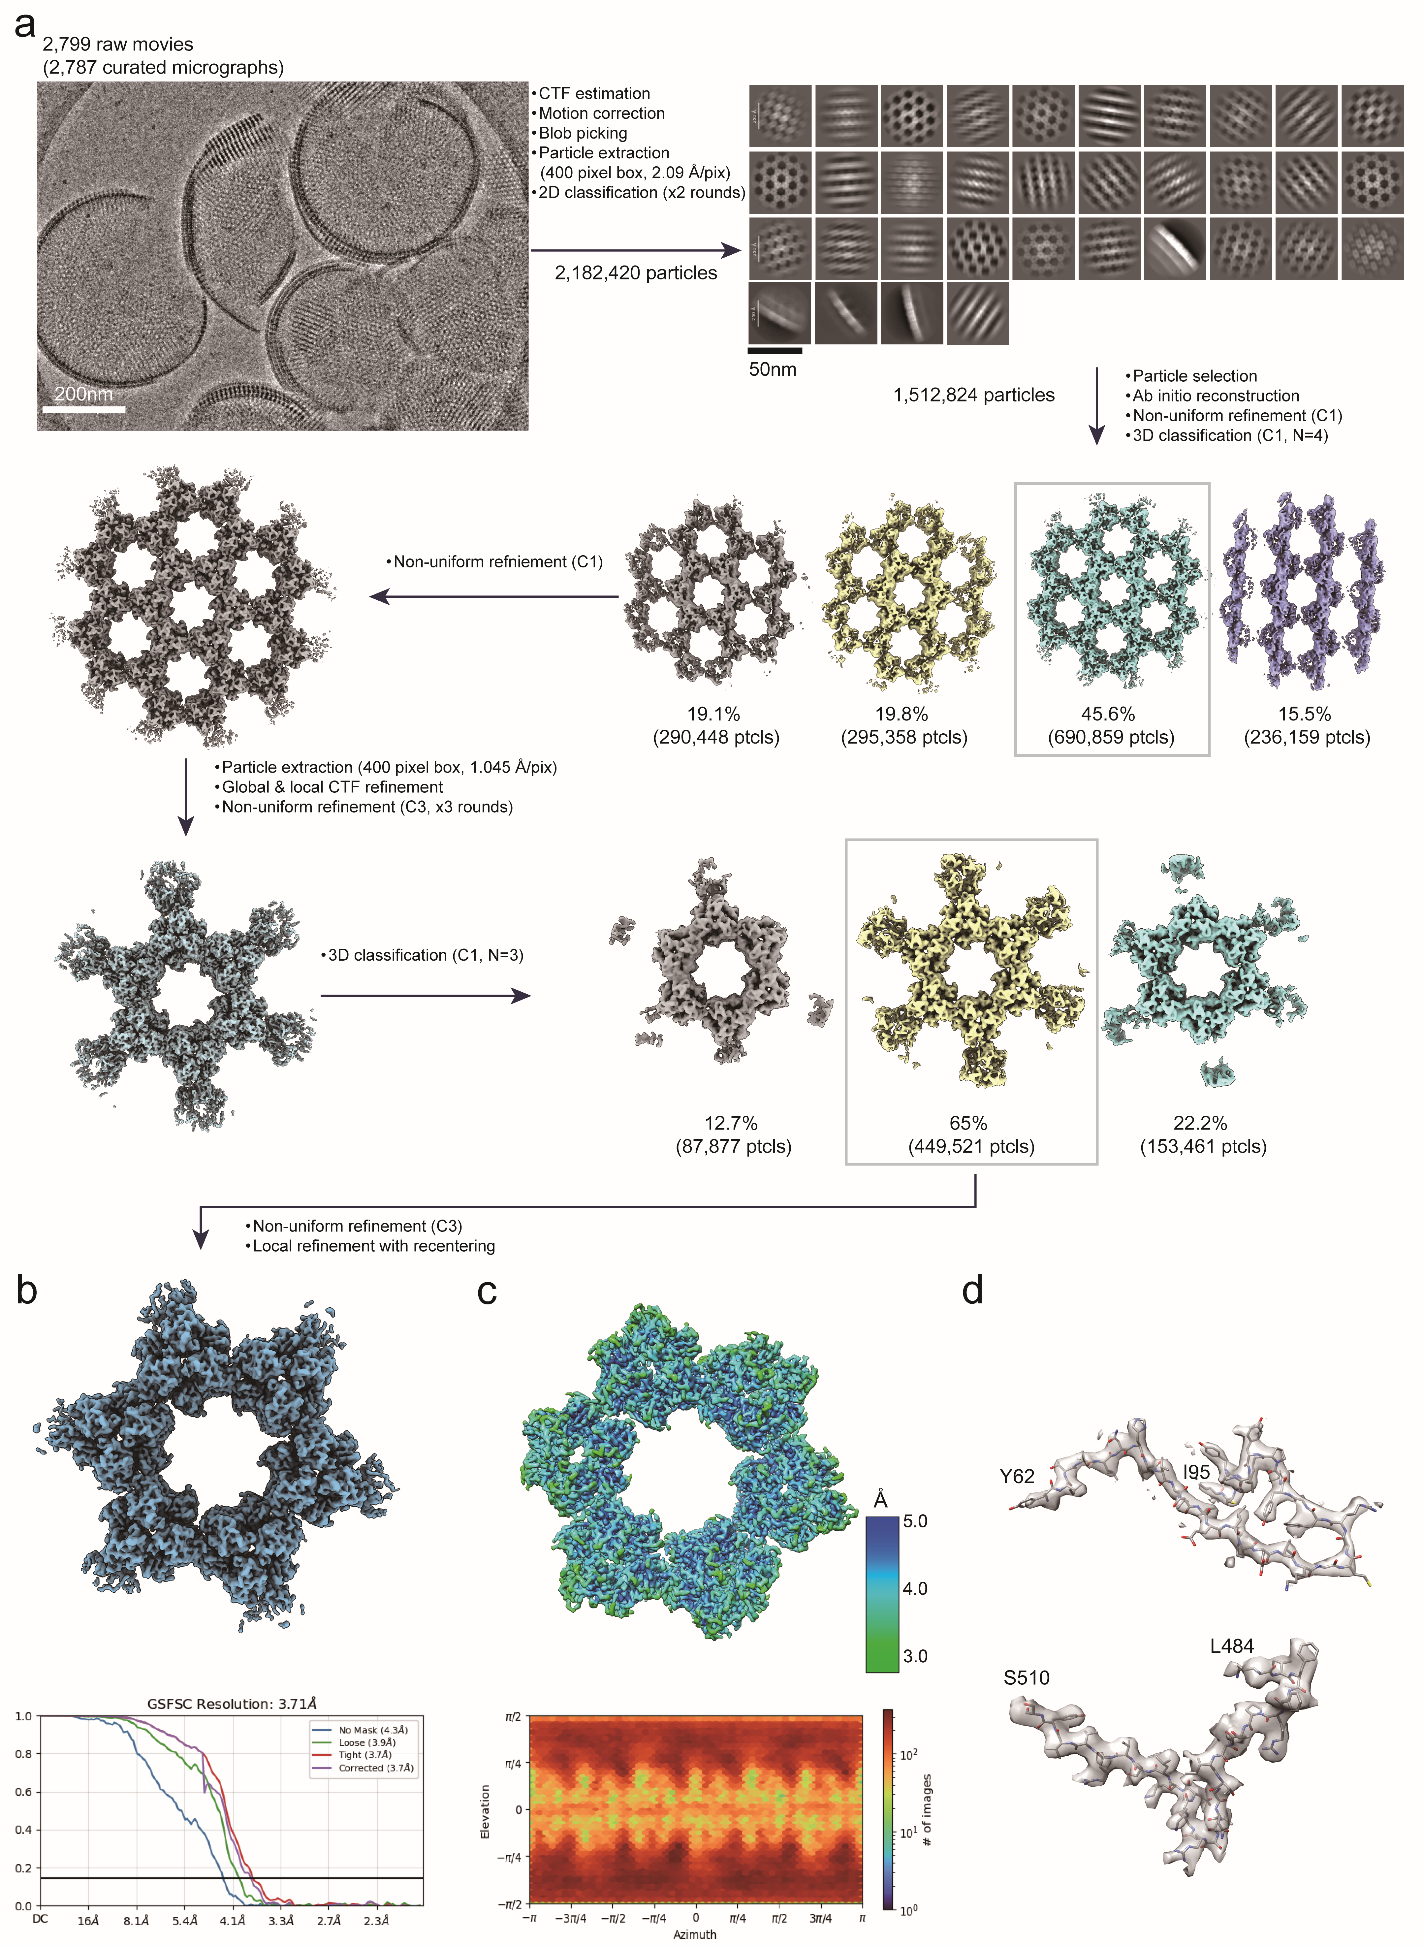


**Supplementary Fig. 5 | Single particle analysis of the A171-8-bound D13 SLP. a**, Image processing workflow of the A171-8-bound D13 SLP. **b**, Final 3D reconstruction and FSC plot that indicates 3.70Å resolution (FSC=0.143). **c**, Local resolution estimation (top panel) and angular particle orientation plot (bottom panel). **d**, Example of fitted atomic model into the cryo-EM map.

**Supplementary Table 1 | List of D13 cloning primers**

| **DNA fragment**  **for cloning** | **Primer** | **Primer sequence** | **Template** |
| --- | --- | --- | --- |
| **EGFP-Linker** | F | 5’- GATCGAGAATTCCCAACGACCGAAAACCTGTATTTTCAGGGCGTGAGCAAGGGCGAGG  -3’ | pSpCas9(BB)-2A-GFP |
| R | 5’-ACCTCCGCCTGAACCGCCACCTCCCTTGTACAGCTCGTCCATG-3’ |
| **Linker- D13** | F | 5’-GGCGGTTCAGGCGGAGGTGGCTCTGGCGGTGGCGGATCGATGAATAATACTATCATTAATTCTTTGATCGGTG-3’ | D13 pPROEX-Hta |
| R | 5’- TATCGTAAGCTTTTAGTTATTATCTCCCATAATC -3’ |
| **F486A** | F | 5'-  ACCAAAGATAGCGTTTAGGCCGACAAC-3’ | D13 pPROEX-Hta |
| R | 5'-  GTAAAGTTAAAAGTTAGGGTTCTTGTTCC-3’ |

**Supplementary Table 2 | Sequences and molecular weights of the A17 peptide**.

| **Peptide** | **Sequence**  **(PNA: 5’ – 3’ / peptide: N – C)** | **Molecular weight (Da)** |
| --- | --- | --- |
| A171-8 | MSYLRYYN | 1109.26 |

**Supplementary Table 3 | Cryo-EM data collection, refinement and validation statistics**

|  | #1 SLP_STA  (EMDB-64468) | #2 Twister_STA  (EMDB-64469) | #3 SLP_SPA  (EMDB-64474)  (PDB 9USX) | #4 eGFP-D13_SPA  (EMDB-64475)  (PDB 9USY) |
| --- | --- | --- | --- | --- |
| **Data collection and processing** |  |  |  |  |
| Magnification | 42,000 | 59,000 | 42,000 | 42,000 |
| Voltage (kV) | 300 | 300 | 300 | 300 |
| Electron exposure (e–/Å2) | 120 | 120 | 38.6 | 50 |
| Defocus range (μm) | -1.5 to -2.5 | -2.5 to -3.5 | -1.5 to -2.5 | -1.6 to -2.6 |
| Pixel size (Å) | 2.12 | 1.36 | 1.045 | 1.045 |
| Symmetry imposed | C6 | C1 | C3 | C3 |
| Initial particle images (no.) | 81,939 | 3,499 | 1,209,388 | 1,671,619 |
| Final particle images (no.) | 39,393 | 1,620 | 722,411 | 285,080 |
| Map resolution (Å)  FSC threshold | 14 | 13.0 | 2.88  0.143 | 3.70  0.143 |
| Map resolution range (Å) |  |  |  |  |
|  |  |  |  |  |
| **Refinement** |  |  |  |  |
| Initial model used (PDB code) |  |  | 7VFD | 7VFD |
| Model resolution (Å)  FSC threshold |  |  | 2.9/2.9/3.1  (0.0/0.143/0.5) | 3.7/3.8/4.1  (0.0/0.143/0.5) |
| Model resolution range (Å) |  |  |  |  |
| Map sharpening *B* factor (Å2) |  |  | 103.8 | 119.4 |
| Model composition  Non-hydrogen atoms  Protein residues  Ligands |  |  | 75,972  9,540  — | 75,972  9,540  — |
| *B* factors (Å2)  Protein  Ligand |  |  | 96.77  — | 103.12  — |
| R.m.s. deviations  Bond lengths (Å)  Bond angles (°) |  |  | 0.004  0.955 | 0.004  0.938 |
| Validation  MolProbity score  Clashscore  Poor rotamers (%) |  |  | 1.18  3.88  0.00 | 1.16  3.71  0.00 |
| Ramachandran plot  Favored (%)  Allowed (%)  Disallowed (%) |  |  | 98.09  1.91  0.00 | 98.02  1.98  0.00 |

**Supplementary Table 2 | Cryo-EM data collection, refinement and validation statistics (continued)**

|  | #5 Twister_SPA  (EMDB-64470) | #6 Twister_SPA  Mode I  (EMDB-64471)  (PDB 9USU) | #7 Twister_SPA  ModeII  (EMDB-64472)  (PDB 9USV) | #8 Twister_SPA  Mode III  (EMDB-64473)  (PDB 9USW) |
| --- | --- | --- | --- | --- |
| **Data collection and processing** |  |  |  |  |
| Magnification | 59,000 | 59,000 | 59,000 | 59,000 |
| Voltage (kV) | 300 | 300 | 300 | 300 |
| Electron exposure (e–/Å2) | 50 | 50 | 50 | 50 |
| Defocus range (μm) | -1.4 to -2.2 | -1.4 to -2.2 | -1.4 to -2.2 | -1.4 to -2.2 |
| Pixel size (Å) | 1.33 | 1.33 | 1.33 | 1.33 |
| Symmetry imposed | C1 | C2 | C1 | C1 |
| Initial particle images (no.) | 1,500,729 | 1,500,729 | 1,500,729 | 1,500,729 |
| Final particle images (no.) | 104,933 | 104,933 | 104,933 | 104,933 |
| Map resolution (Å)  FSC threshold | 3.9  0.143 | 2.9  0.143 | 3.2  0.143 | 3.1  0.143 |
| Map resolution range (Å) |  |  |  |  |
|  |  |  |  |  |
| **Refinement** |  |  |  |  |
| Initial model used (PDB code) |  | 7VFD | 7VFD | 7VFD |
| Model resolution (Å)  FSC threshold |  | 2.8/2.9/3.1  0/0.143/0.5 | 3.1/3.2/3.4  0/0.143/0.5 | 3.0/3.1/3.3  0/0.143/0.5 |
| Model resolution range (Å) |  |  |  |  |
| Map sharpening *B* factor (Å2) |  | 66.6 | 65.0 | 63.6 |
| Model composition  Non-hydrogen atoms  Protein residues  Ligands |  | 25296  3180  — | 25460  3202  — | 25542  3213  — |
| *B* factors (Å2)  Protein  Ligand |  | 58.85  — | 74.27  — | 69.19  — |
| R.m.s. deviations  Bond lengths (Å)  Bond angles (°) |  | 0.004  0.588 | 0.003  0.494 | 0.003  0.491 |
| Validation  MolProbity score  Clashscore  Poor rotamers (%) |  | 1.47  6.82  0.00 | 1.48  6.43  0.00 | 1.41  6.29  0.00 |
| Ramachandran plot  Favored (%)  Allowed (%)  Disallowed (%) |  | 97.52  2.48  0.00 | 97.35  2.65  0.00 | 97.70  2.30  0.00 |

**Supplementary Table 2 | Cryo-EM data collection, refinement and validation statistics (continued)**

|  | #9 D13-A17 trimer  (EMDB-64476)  (PDB 9USZ) | #10 D13-A17 SLP  (EMDB-64477)  (PDB 9UT0) |
| --- | --- | --- |
| **Data collection and processing** |  |  |
| Magnification | 92,000 | 42,000 |
| Voltage (kV) | 200 | 300 |
| Electron exposure (e–/Å2) | 51.49 | 50 |
| Defocus range (μm) | -1.2 to -2.2 | -1.5 to -2.5 |
| Pixel size (Å) | 1.067 | 1.045 |
| Symmetry imposed | C1 | C3 |
| Initial particle images (no.) | 4,387,513 | 2,182,420 |
| Final particle images (no.) | 2,044,397 | 449,521 |
| Map resolution (Å)  FSC threshold | 2.48  0.143 | 3.71  0.143 |
| Map resolution range (Å) |  |  |
|  |  |  |
| **Refinement** |  |  |
| Initial model used (PDB code) | 7VFD | 7VFD |
| Model resolution (Å)  FSC threshold | 2.3/2.4/2.5  0/0.143/0.5 | 3.7/3.8/4.0  (0.0/0.143/0.5) |
| Model resolution range (Å) |  |  |
| Map sharpening *B* factor (Å2) | 119.2 | 122.4 |
| Model composition  Non-hydrogen atoms  Protein residues  Ligands | 12912  1623  — | 75,972  9,540  — |
| *B* factors (Å2)  Protein  Ligand | 23.93  — | 105.39  — |
| R.m.s. deviations  Bond lengths (Å)  Bond angles (°) | 0.005  0.642 | 0.004  0.943 |
| Validation  MolProbity score  Clashscore  Poor rotamers (%) | 1.68  8.75  0.00 | 1.17  3.77  0.00 |
| Ramachandran plot  Favored (%)  Allowed (%)  Disallowed (%) | 96.69  3.31  0.00 | 98.23  1.77  0.00 |
